# Supplementary material for: lncRNA MALAT1/miR-26a/26b/ST8SIA4 axis mediates cell invasion and migration in breast cancer cell lines
Source: PubMed Central journal article supplement — Oncol Rep. 2021 Jul 6;46(2):181. doi: 10.3892/or.2021.8132 (PMC8273684; doi:10.3892/or.2021.8132), 2021-07-06

Figure S1. Cell-transfected efficiency is detected by RT-qPCR. (A) MALAT1 expression was detected by RT-qPCR in the transfected MCF-7 cells and MDA-MB-231 cells. (B) MiR-26a expression was detected by RT-qPCR in the transfected MCF-7 cells and MDA-MB-231 cells. (C) MiR-26b expression was detected by RT-qPCR in the transfected MCF-7 cells and MDA-MB-231 cells. \*P<0.05. MALAT1, metastasis-associated lung adenocarcinoma transcript 1; miR, microRNA; RT-qPCR, reverse transcription-quantitative PCR; si, small interfering; SCR, scrambled..

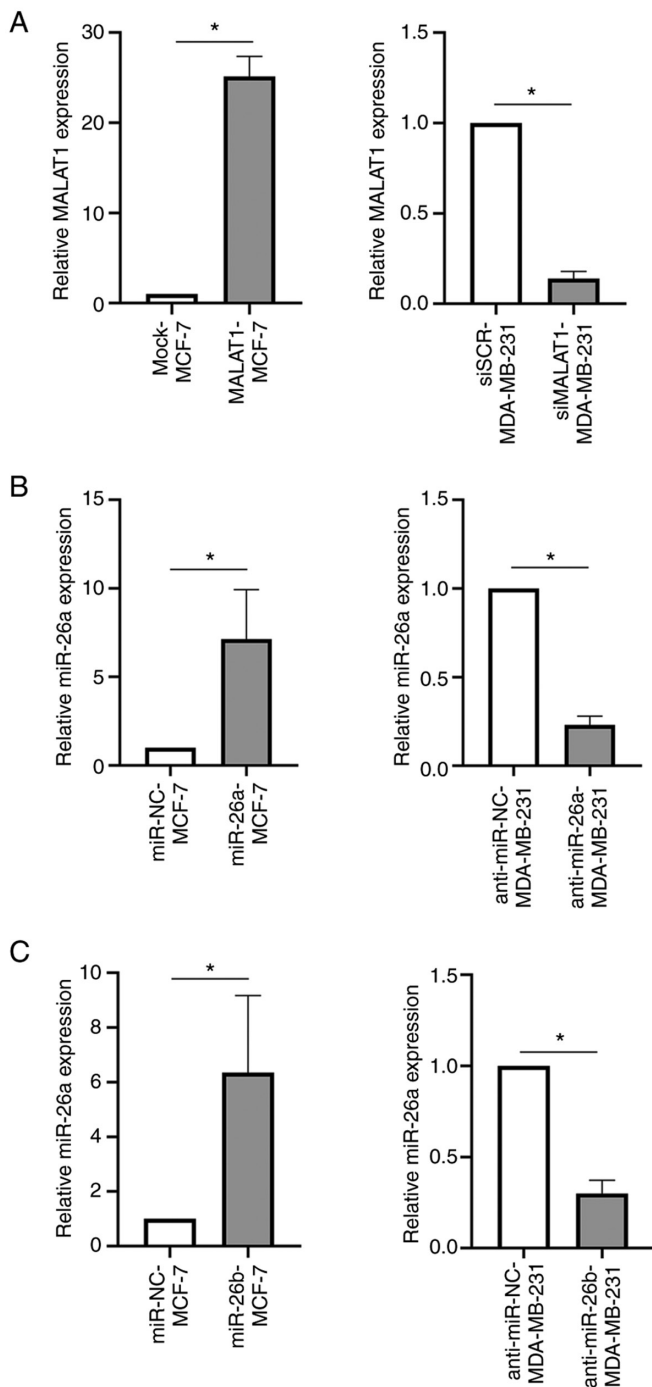

Supplement: Supplementary_Data.pdf [file Supplementary_Data.pdf]
